# Supplementary material for: Microwave-assisted methylation of dihydroxybenzene derivatives with dimethyl carbonate
Source: Royal Society of Chemistry journal article supplement (doi:10.1039/c6ra09841j), 2016-01-01
Supplement: c6ra09841j1.pdf [file c6ra09841j1.pdf]

Supplementary Information for:

## Microwave-assisted Methylation of Dihydroxybenzene Derivatives with Dimethyl Carbonate

Matthew Y. Lui, Kapil S. Lokare, Ellen Hemming, Jessica N. G. Stanley, Alvise Perosa, Maurizio Selva, Anthony F. Masters and Thomas Maschmeyer\*

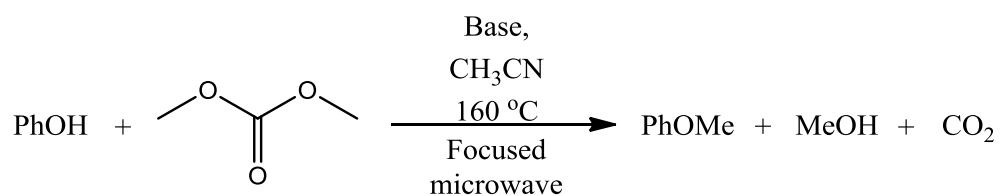

| Entry | Base                            | Time (min) | % yield |
|-------|---------------------------------|------------|---------|
| 1     | None                            | 20         | 0       |
| 2     | DBU                             | 20         | 93.2    |
| 3     | DABCO                           | 20         | 85.3    |
| 4     | Triethylamine                   | 20         | 14.1    |
| 5     | Pyridine                        | 20         | 0.4     |
| 6     | KOH                             | 20         | 6.2     |
| 8     | K <sub>2</sub> CO <sub>3</sub>  | 20         | 4.7     |
| 9     | Cs <sub>2</sub> CO <sub>3</sub> | 20         | 63.7    |

Table S1 – Mixtures of phenol (0.92 mmol), base (0.92 mmol), mesitylene std. (100 μL), DMC (1 mL) and MeCN (1 mL) were heated at 160 °C for 20 min in an Anton Parr 300 focused microwave. Yield determined using GC-FID, after acidification (1M HCl, 5 mL) and extraction into ethyl acetate (10 x 1 mL).
